# Supplementary material for: Integrating metabolic profiling of pancreatic juice with transcriptomic analysis of pancreatic cancer tissue identifies distinct clinical subgroups
Source: PubMed Central journal article supplement (PMC11234733; doi:10.3389/fonc.2024.1405612), 2024-06-26
Supplement: DataSheet_1.pdf [file DataSheet_1.pdf]

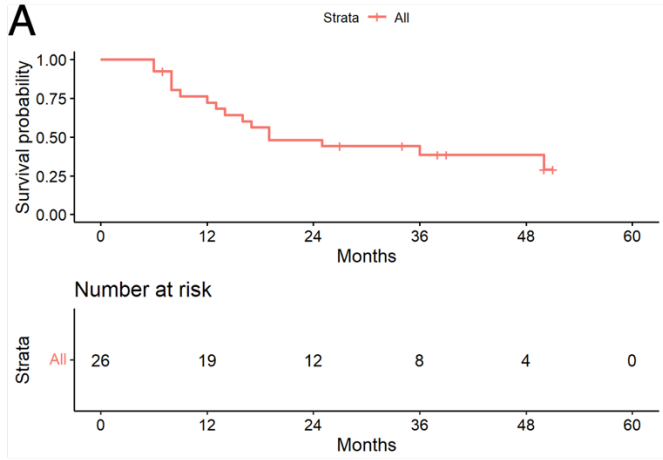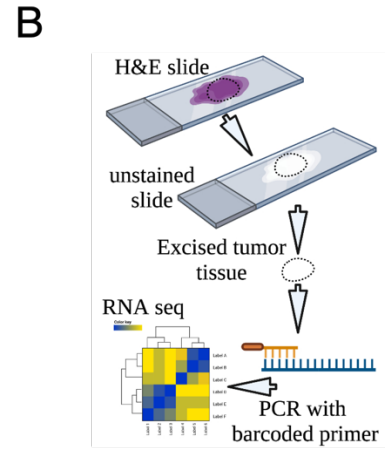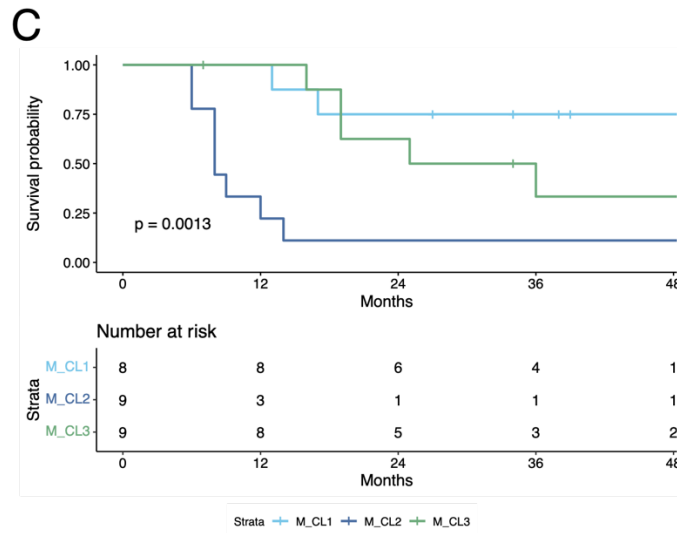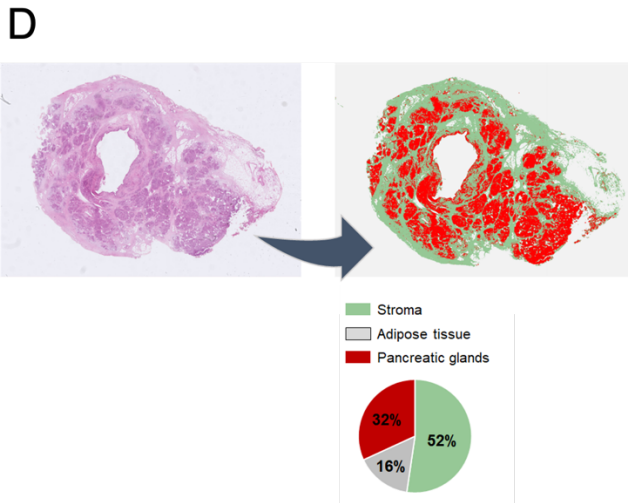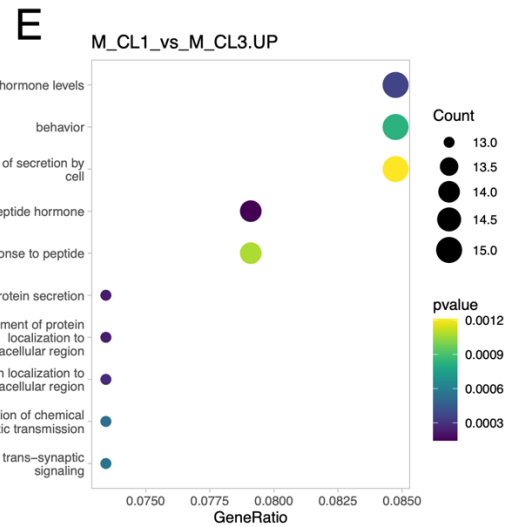

**Supplementary Figure 1.** (A) Overall survival for the whole population cohort. Median OS is 38 months (95% CI 8-30 months) (B) Schematic of the TempO-Seq™ workflow. (C) Survival analysis of patients categorized as M\_CL1, M\_CL2, M\_CL3 according to metabolic profile (p=0.0013 by log-rank test). (D) Schematic of the digital pathology approach used to annotate pancreatic tissue as stroma, adipose or pancreatic gland. (E) Enrichment pathway analysis of M\_CL1 versus M\_CL3 samples. Dot-plot shows top 10 enriched GO terms in M\_CL1, ordered by gene ratio (percentage of DEGs in the GO term) and color-coded by p-value. The size of the dot represents the count of the genes in the GO term.

| <b>Metabolites</b>                  | <b>Fold Change<br/>PDAC vs non<br/>PDAC</b> |
|-------------------------------------|---------------------------------------------|
| <b>Dihydrothymine</b>               | 1.40                                        |
| <b>Lactic acid</b>                  | 1.62                                        |
| <b>3-Hydroxymethylglutaric acid</b> | 1.75                                        |
| <b>Uridine</b>                      | 1.99                                        |
| <b>Valine</b>                       | 2.02                                        |
| <b>Methionine sulfone</b>           | 2.12                                        |
| <b>N8-Acetylspermidine</b>          | 2.53                                        |
| <b>Butyrylcarnitine</b>             | 2.96                                        |
| <b>Pantothenic acid</b>             | 3.03                                        |
| <b>Cysteine-S-sulfate</b>           | 3.19                                        |
| <b>Methionine sulfoxide</b>         | 3.49                                        |
| <b>Galacturonic acid</b>            | 3.60                                        |
| <b>Alanylisoleucine</b>             | 4.05                                        |
| <b>Glycerophosphocholine</b>        | -5.14                                       |
| <b>N-Acetyl-L-aspartic acid</b>     | -2.12                                       |
| <b>Ethanolamine</b>                 | -1.54                                       |
| <b>Isopentenyl pyrophosphate</b>    | -1.26                                       |
| <b>4-Guanidinobutanoic acid</b>     | -1.17                                       |

**Supplementary Figure 2.** Metabolites significantly different in PDAC versus non PDAC juices (by Wilcoxon-Mann-Whitney test), confirmed by MS/MS.

| Variable                       | N  | Overall, N = 26 <sup>1</sup> | Cluster 1, N = 8 <sup>1</sup> | Cluster 2, N = 9 <sup>1</sup> | Cluster 3, N = 9 <sup>1</sup> | p-value <sup>2</sup> |
|--------------------------------|----|------------------------------|-------------------------------|-------------------------------|-------------------------------|----------------------|
| <b>Molecular subtype</b>       | 26 |                              |                               |                               |                               | <b>0.004</b>         |
| Classical                      |    | 10 (38%)                     | 2 (25%)                       | 6 (67%)                       | 2 (22%)                       |                      |
| Intermediate                   |    | 8 (31%)                      | 6 (75%)                       | 0 (0%)                        | 2 (22%)                       |                      |
| Squamous                       |    | 8 (31%)                      | 0 (0%)                        | 3 (33%)                       | 5 (56%)                       |                      |
| <b>Gender</b>                  | 26 |                              |                               |                               |                               | <b>0.2</b>           |
| Female                         |    | 15 (58%)                     | 5 (62%)                       | 7 (78%)                       | 3 (33%)                       |                      |
| Male                           |    | 11 (42%)                     | 3 (38%)                       | 2 (22%)                       | 6 (67%)                       |                      |
| <b>Age at surgery</b>          | 26 | 72.50 (45.00-85.00)          | 76.50 (45.00-85.00)           | 72.00 (59.00-78.00)           | 68.00 (56.00-82.00)           | <b>0.3</b>           |
| <b>BMI</b>                     | 26 | 24.00 (20.00-34.00)          | 23.50 (21.00-27.00)           | 22.00 (20.00-34.00)           | 25.00 (23.00-27.00)           | <b>0.3</b>           |
| <b>Diabetes</b>                | 26 | 13 (50%)                     | 3 (38%)                       | 4 (44%)                       | 6 (67%)                       | <b>0.6</b>           |
| <b>Neoadjuvant therapy</b>     | 26 | 1 (3.8%)                     | 0 (0%)                        | 1 (11%)                       | 0 (0%)                        | <b>&gt;0.9</b>       |
| <b>Adjuvant therapy</b>        | 26 | 13 (50%)                     | 4 (50%)                       | 3 (33%)                       | 6 (67%)                       | <b>0.4</b>           |
| <b>Perineural invasion</b>     | 26 | 24 (92%)                     | 7 (88%)                       | 8 (89%)                       | 9 (100%)                      | <b>0.8</b>           |
| <b>Lymphovascular invasion</b> | 26 | 22 (85%)                     | 6 (75%)                       | 8 (89%)                       | 8 (89%)                       | <b>0.7</b>           |
| <b>R status</b>                | 26 |                              |                               |                               |                               | <b>0.092</b>         |
| R0                             |    | 14 (54%)                     | 7 (88%)                       | 3 (33%)                       | 4 (44%)                       |                      |
| R1                             |    | 12 (46%)                     | 1 (12%)                       | 6 (67%)                       | 5 (56%)                       |                      |
| <b>MPD diameter, mm</b>        | 19 | 5.00 (2.00-10.00)            | 6.00 (2.00-10.00)             | 5.00 (3.00-7.00)              | 4.50 (3.00-7.00)              | <b>0.8</b>           |
| (Missing)                      |    | 7                            | 1                             | 3                             | 3                             |                      |
| <b>T</b>                       | 26 |                              |                               |                               |                               | <b>0.5</b>           |
| T1                             |    | 4 (15%)                      | 2 (25%)                       | 1 (11%)                       | 1 (11%)                       |                      |
| T2                             |    | 11 (42%)                     | 4 (50%)                       | 5 (56%)                       | 2 (22%)                       |                      |
| T3                             |    | 11 (42%)                     | 2 (25%)                       | 3 (33%)                       | 6 (67%)                       |                      |
| <b>N</b>                       | 26 |                              |                               |                               |                               | <b>0.5</b>           |
| N0                             |    | 5 (19%)                      | 3 (38%)                       | 1 (11%)                       | 1 (11%)                       |                      |
| N1                             |    | 9 (35%)                      | 3 (38%)                       | 2 (22%)                       | 4 (44%)                       |                      |
| N2                             |    | 12 (46%)                     | 2 (25%)                       | 6 (67%)                       | 4 (44%)                       |                      |
| <b>M</b>                       | 26 |                              |                               |                               |                               | <b>0.3</b>           |
| M0                             |    | 23 (88%)                     | 6 (75%)                       | 8 (89%)                       | 9 (100%)                      |                      |
| M1                             |    | 3 (12%)                      | 2 (25%)                       | 1 (11%)                       | 0 (0%)                        |                      |
| <b>Stage</b>                   | 26 |                              |                               |                               |                               | <b>0.5</b>           |
| I                              |    | 3 (12%)                      | 1 (12%)                       | 1 (11%)                       | 1 (11%)                       |                      |
| II                             |    | 10 (38%)                     | 4 (50%)                       | 2 (22%)                       | 4 (44%)                       |                      |
| III                            |    | 10 (38%)                     | 1 (12%)                       | 5 (56%)                       | 4 (44%)                       |                      |
| IV                             |    | 3 (12%)                      | 2 (25%)                       | 1 (11%)                       | 0 (0%)                        |                      |

<sup>1</sup> n (%); Median (Minimum-Maximum)<sup>2</sup> Fisher's exact test; Kruskal-Wallis rank sum test

**Supplementary Table 1.** Characteristics of the study population.

| <b>Characteristic</b>           | <b>N (%)</b>    |
|---------------------------------|-----------------|
| <b>Gender</b>                   |                 |
| Female                          | 35 (50)         |
| Male                            | 35 (50)         |
| <b>Age at surgery</b>           |                 |
| Median; range                   | 70; 43-85       |
| ≤70 yrs/>70 yrs                 | 35 (50)/35 (50) |
| <b>Neoadjuvant therapy</b>      |                 |
| Yes/No                          | 11 (16)/59 (84) |
| <b>Diagnosis</b>                |                 |
| Ductal Adenocarcinoma           | 58 (83)         |
| Pancreatitis                    | 2 (3)           |
| Papillary-Ampulla Tumor         | 7 (10)          |
| Neuroendocrine                  | 2 (3)           |
| IPMN                            | 1 (1)           |
| <b>BMI</b>                      |                 |
| Median; range                   | 23; 16-32       |
| <b>Perineural invasion*</b>     |                 |
| Yes/No                          | 58 (83)/10 (15) |
| <b>Lymphovascular invasion*</b> |                 |
| Yes/No                          | 55 (83)/13 (15) |
| <b>R status*</b>                |                 |
| R0                              | 30 (52)         |
| R1                              | 28 (48)         |
| <b>Nodal Status*</b>            |                 |
| N0                              | 14 (24)         |
| N1                              | 19 (33)         |
| N2                              | 25 (43)         |
| <b>T status*</b>                |                 |
| T1                              | 4 (7)           |
| T2                              | 33 (57)         |
| T3                              | 20 (35)         |
| <b>M*</b>                       |                 |
| M0                              | 51 (88)         |
| M1                              | 7 (12)          |
| <b>Tumor grade*</b>             |                 |
| G1-2                            | 15 (26)         |
| G3-4                            | 40 (69)         |

**Supplementary Table 2.** Demographics and Clinicopathological Characteristics of 70 patients with pancreatic diseases (cohort 2).
