# Supplementary material for: Integrating metabolic profiling of pancreatic juice with transcriptomic analysis of pancreatic cancer tissue identifies distinct clinical subgroups
Source: PubMed Central journal article supplement (PMC11234733; doi:10.3389/fonc.2024.1405612), 2024-06-26
Supplement: DataSheet_2.pdf [file DataSheet_2.pdf]

| Characteristic            | Event N | HR <sup>1</sup> | 95% CI <sup>1</sup> | p-value      | q-value <sup>2</sup> |
|---------------------------|---------|-----------------|---------------------|--------------|----------------------|
| <b>Metabolic cluster</b>  |         |                 |                     |              |                      |
| Cluster 1                 | 2       | —               | —                   |              |                      |
| Cluster 2                 | 8       | 10.9            | 2.23, 53.5          | <b>0.003</b> | 0.045                |
| Cluster 3                 | 6       | 2.90            | 0.58, 14.4          | 0.2          | >0.9                 |
| <b>Tumor diameter, cm</b> | 16      | 1.02            | 0.78, 1.33          | >0.9         | >0.9                 |
| <b>T</b>                  |         |                 |                     |              |                      |
| T1                        | 1       | —               | —                   |              |                      |
| T2                        | 7       | 3.59            | 0.44, 29.5          | 0.2          | >0.9                 |
| T3                        | 8       | 3.52            | 0.44, 28.3          | 0.2          | >0.9                 |
| <b>N</b>                  |         |                 |                     |              |                      |
| N0                        | 2       | —               | —                   |              |                      |
| N1                        | 4       | 1.00            | 0.18, 5.46          | >0.9         | >0.9                 |
| N2                        | 10      | 2.74            | 0.60, 12.6          | 0.2          | >0.9                 |
| <b>M</b>                  |         |                 |                     |              |                      |
| M0                        | 14      | —               | —                   |              |                      |
| M1                        | 2       | 1.25            | 0.28, 5.55          | 0.8          | >0.9                 |
| <b>Stage</b>              |         |                 |                     |              |                      |
| I                         | 1       | —               | —                   |              |                      |
| II                        | 5       | 1.21            | 0.14, 10.5          | 0.9          | >0.9                 |
| III                       | 8       | 2.61            | 0.32, 21.1          | 0.4          | >0.9                 |
| IV                        | 2       | 2.15            | 0.19, 24.0          | 0.5          | >0.9                 |
| <b>R_status</b>           |         |                 |                     |              |                      |
| R0                        | 7       | —               | —                   |              |                      |
| R1                        | 9       | 1.92            | 0.71, 5.19          | 0.2          | >0.9                 |
| <b>Molecular subtype</b>  |         |                 |                     |              |                      |
| Classical                 | 5       | —               | —                   |              |                      |
| Intermediate              | 4       | 0.84            | 0.22, 3.19          | 0.8          | >0.9                 |
| Squamous                  | 7       | 2.68            | 0.80, 8.93          | 0.11         | >0.9                 |

<sup>1</sup> HR = Hazard Ratio, CI = Confidence Interval

<sup>2</sup> Bonferroni correction for multiple testing

**Table S3. Univariate Cox Regression Table.**
